# Supplementary material for: Dzip3 regulates developmental genes in mouse embryonic stem cells by reorganizing 3D chromatin conformation
Source: PubMed Central journal article supplement (PMC4645096; doi:10.1038/srep16567), 2015-11-16
Supplement: srep16567-s1.pdf [file srep16567-s1.pdf]

**Dzip3 regulates developmental genes in mouse embryonic stem cells by reorganizing 3D chromatin conformation**

**Daishi Inoue<sup>1,2</sup>, Hitoshi Aihara<sup>1</sup>, Tatsuharu Sato<sup>3</sup>, Hirofumi Mizusaki<sup>1</sup>, Masamichi Doiguchi<sup>1</sup>, Miki Higashi<sup>1</sup>, Yuko Imamura<sup>1</sup>, Mitsuhiro Yoneda<sup>1</sup>, Takayuki Miyanishi<sup>4</sup>, Satoshi Fujii<sup>5</sup>, Akihiko Okuda<sup>6</sup>, Takeya Nakagawa<sup>1\*</sup>, Takashi Ito<sup>1, 2\*</sup>**

<sup>1</sup>Department of Biochemistry, Nagasaki University School of Medicine

<sup>2</sup>Nagasaki University Graduate School of Biomedical Sciences

<sup>3</sup>Department of Pediatrics, Nagasaki University Hospital

<sup>4</sup>Department of Environmental Science, Nagasaki University

<sup>5</sup> Kyushu Institute of Technology, Fukuoka820-8502, Japan

<sup>6</sup>Division of Developmental Biology, Saitama Medical School Research Center for Genomic Medicine

**\*Equal corresponding author**

**E-mail:tnakagawa@nagasaki-u.ac.jp, tito@nagasaki-u.ac.jp**

**A**

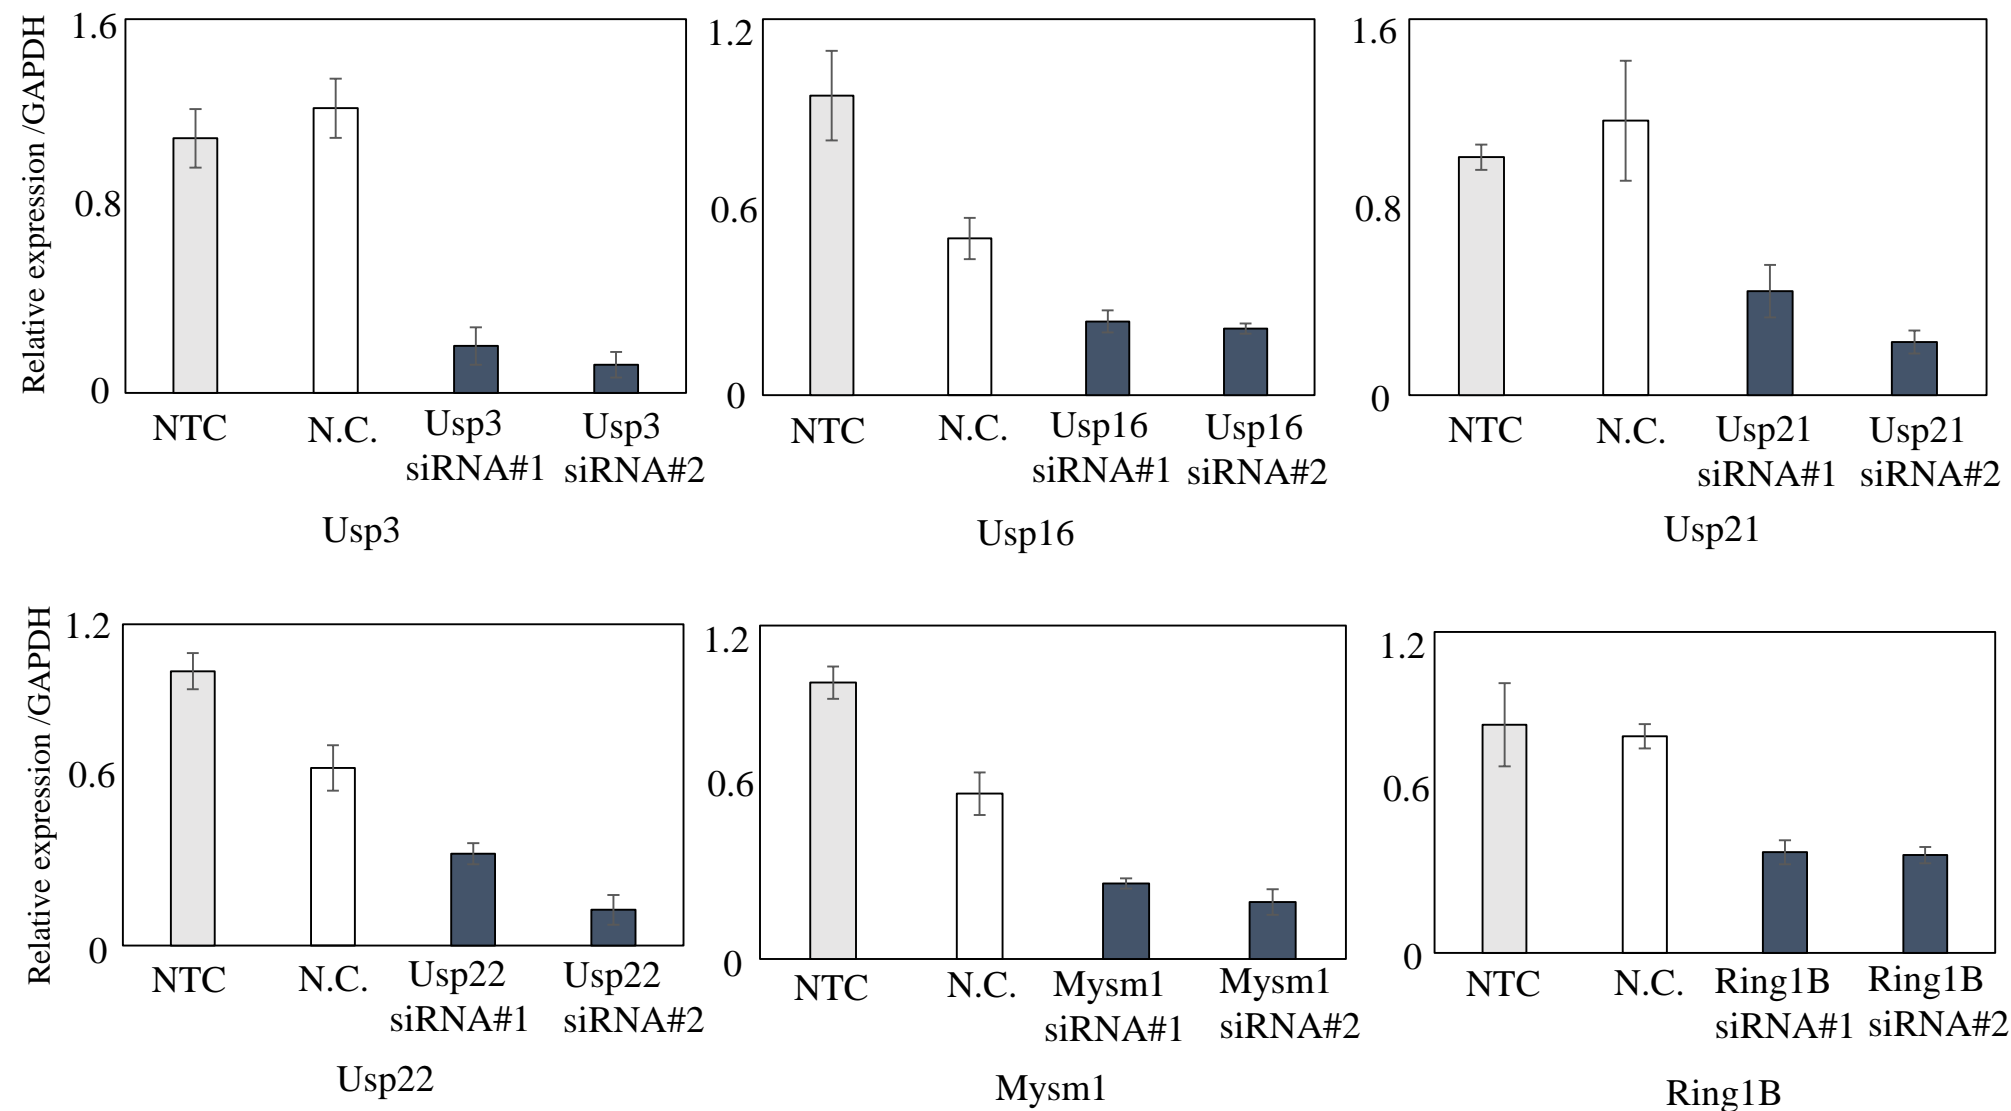

**B**

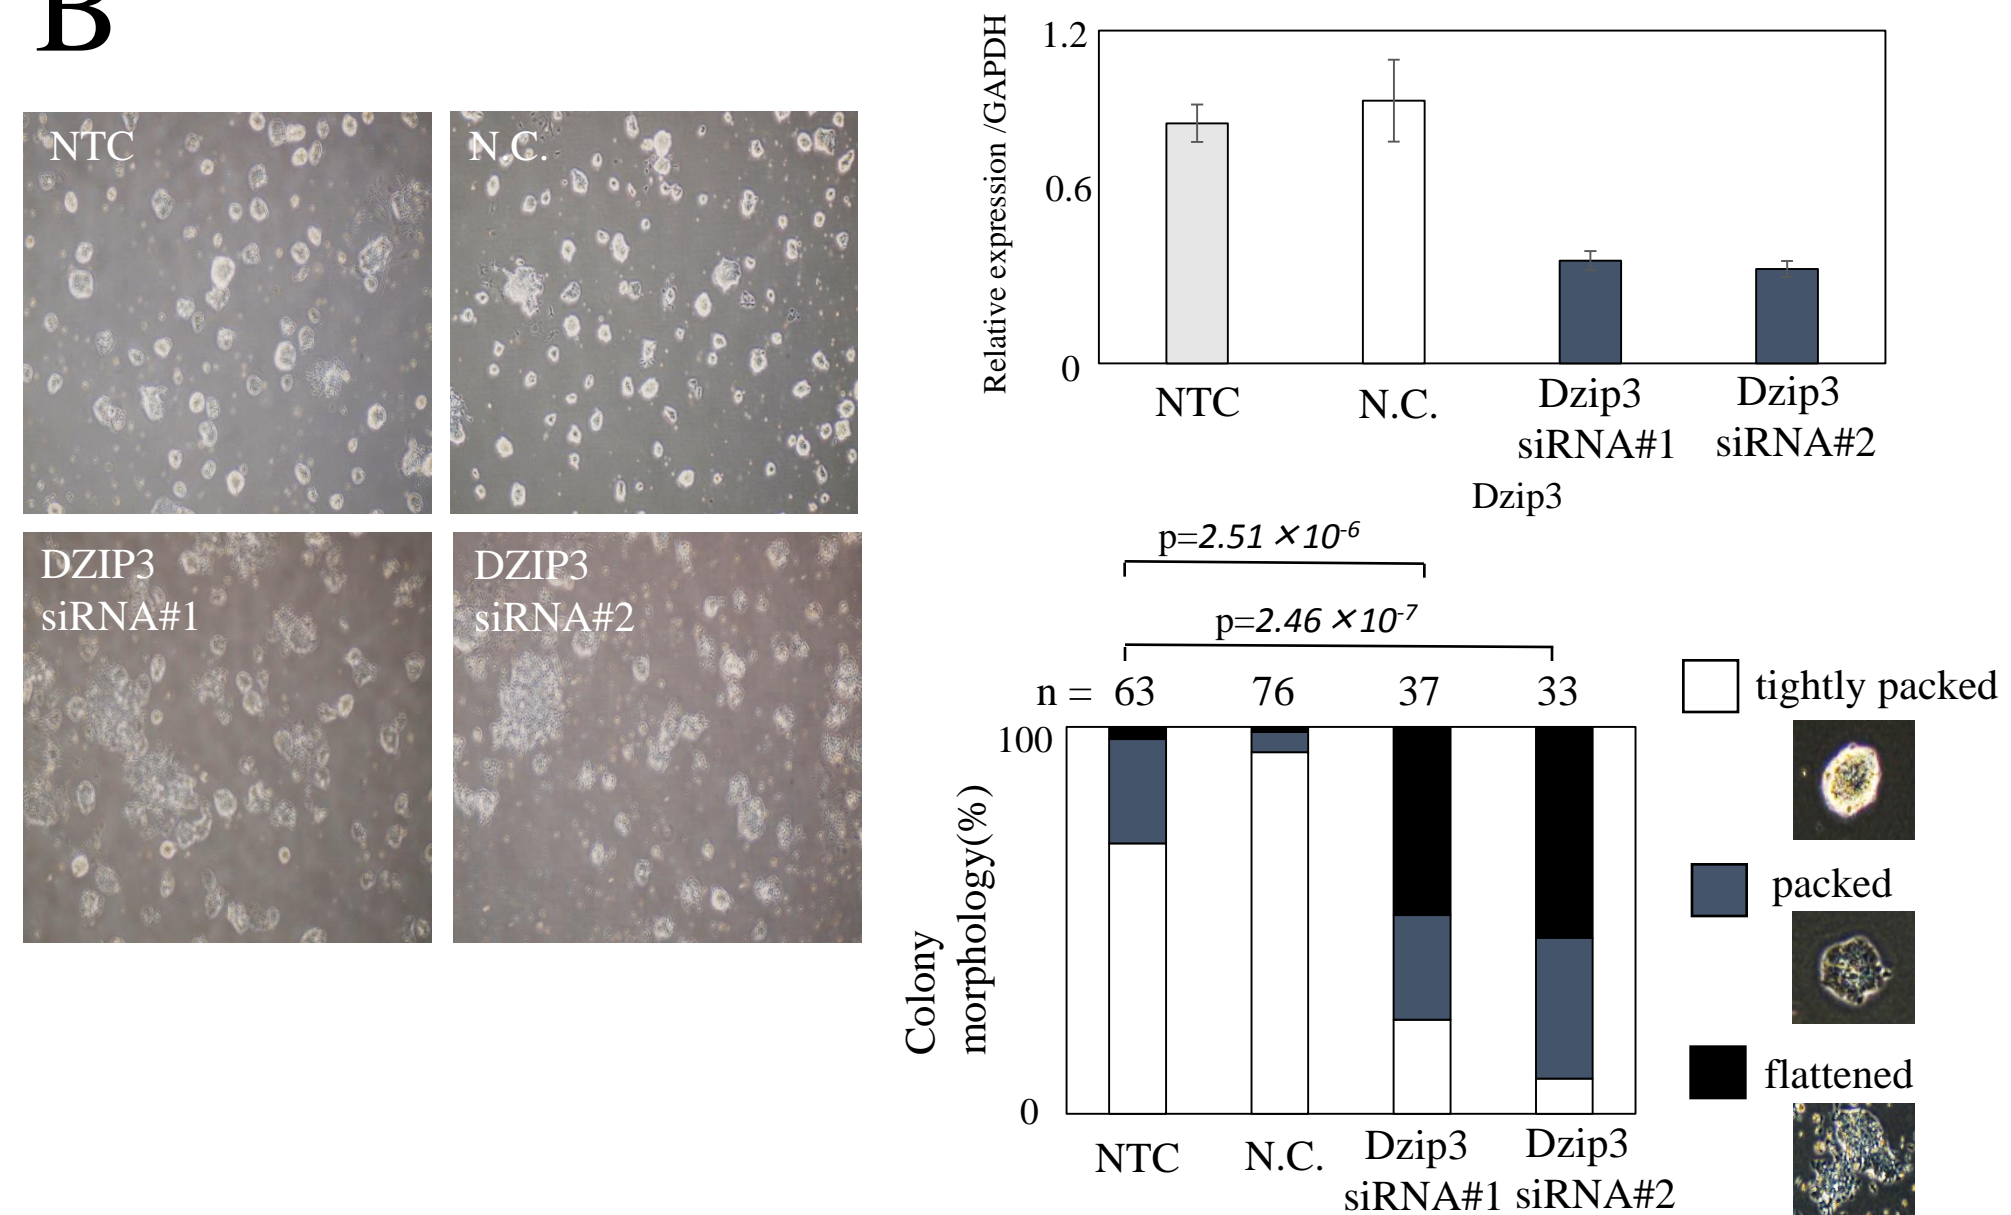

**A**

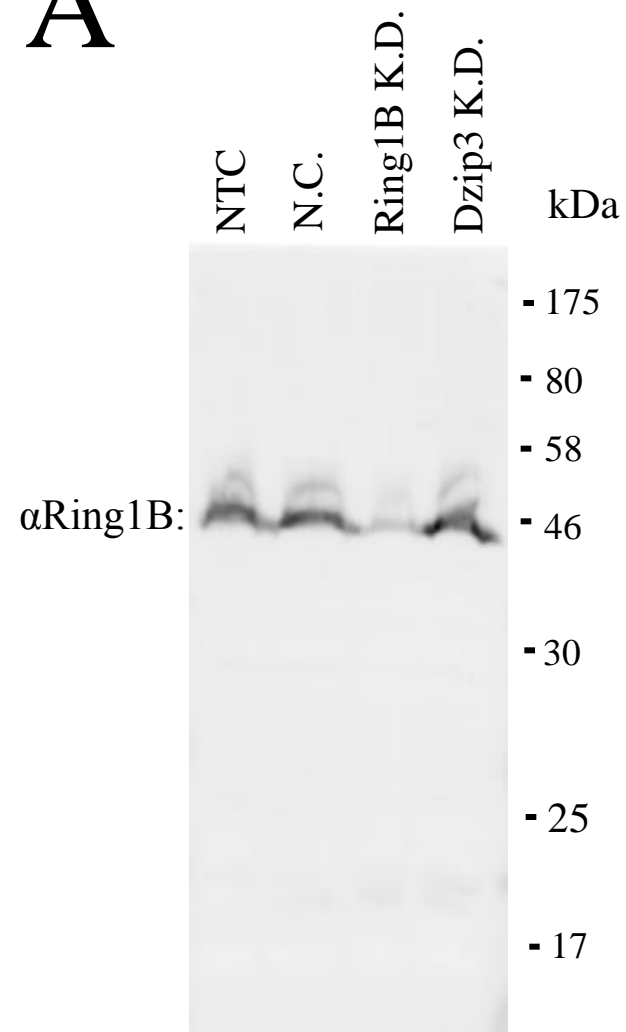

**B**

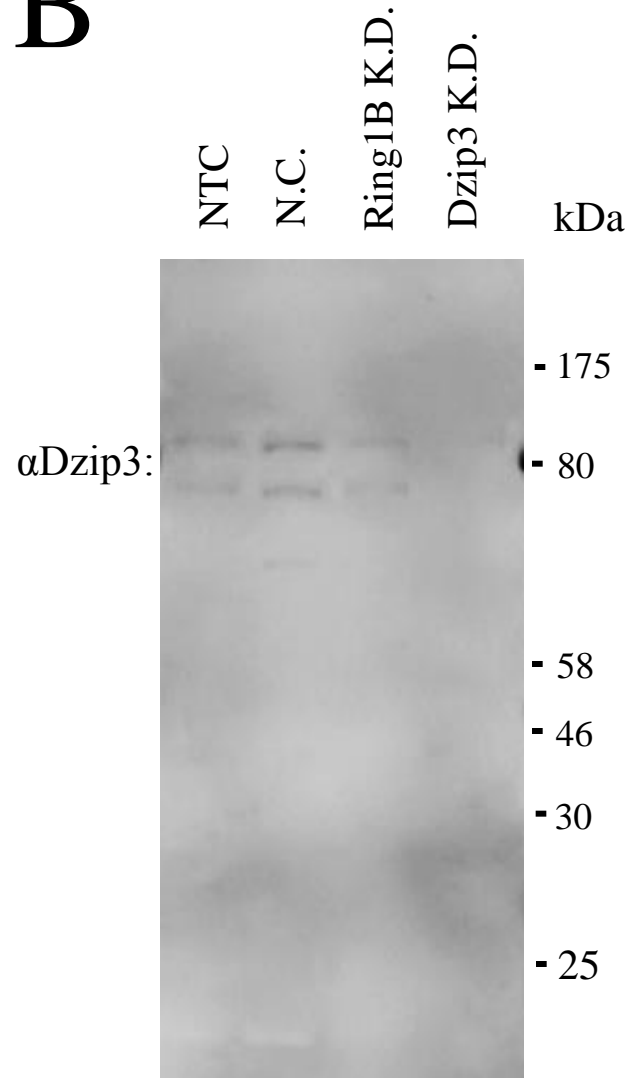

**C**

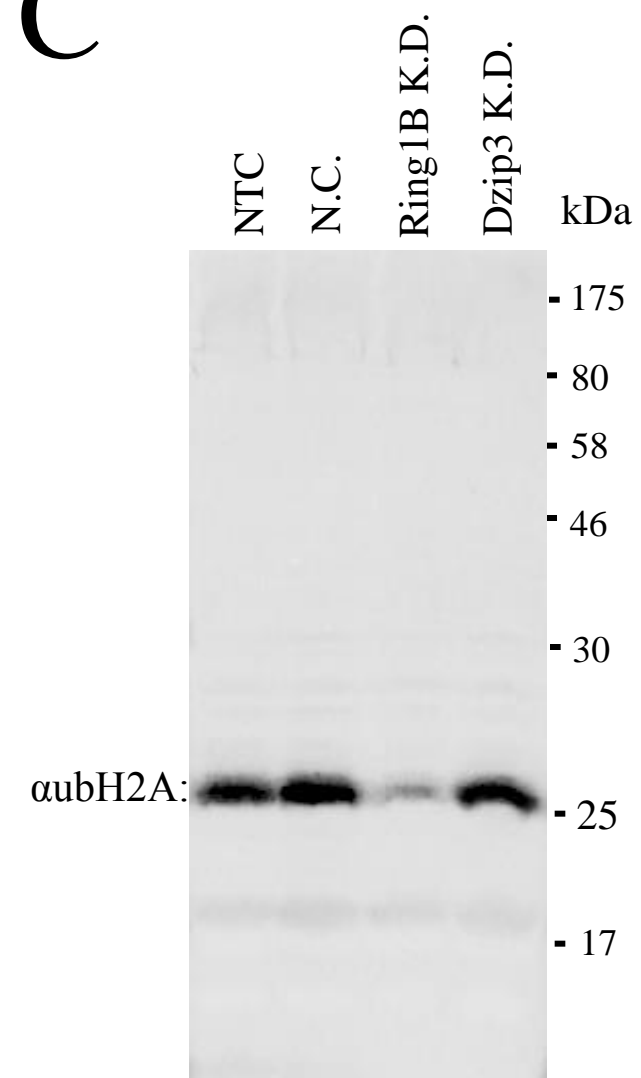

**D**

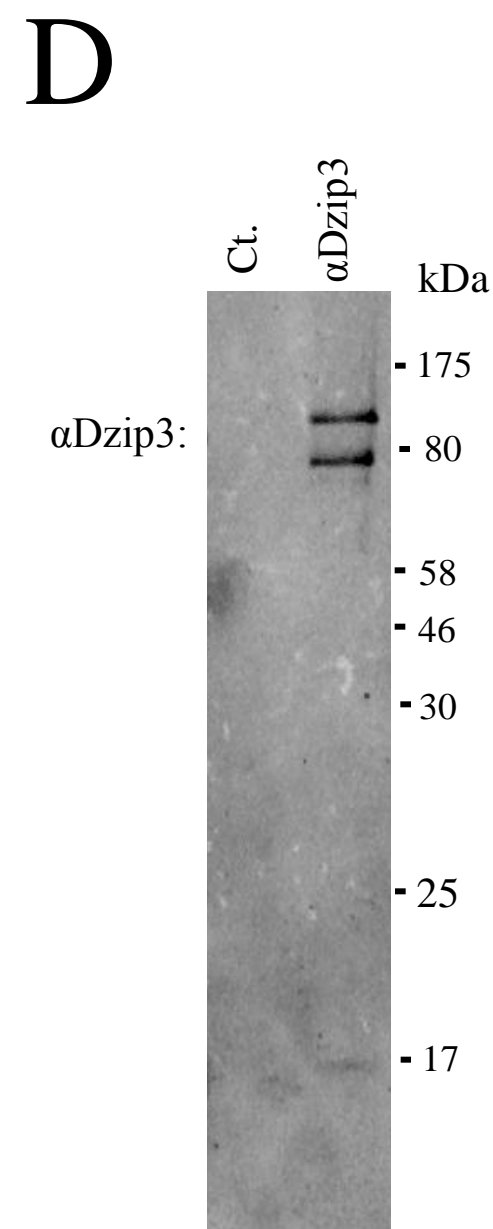

**E**

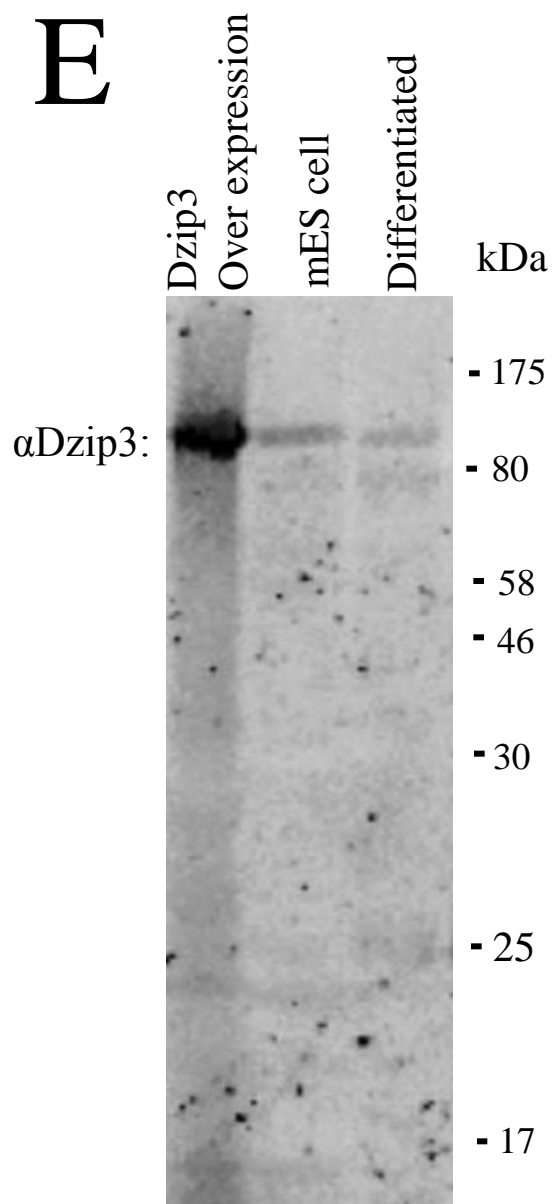

**F**

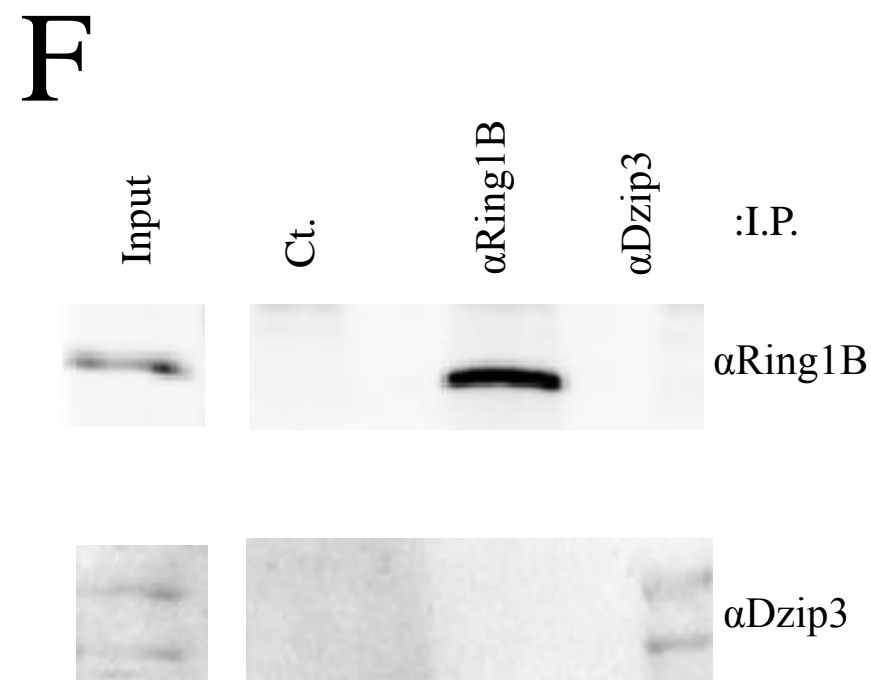

A

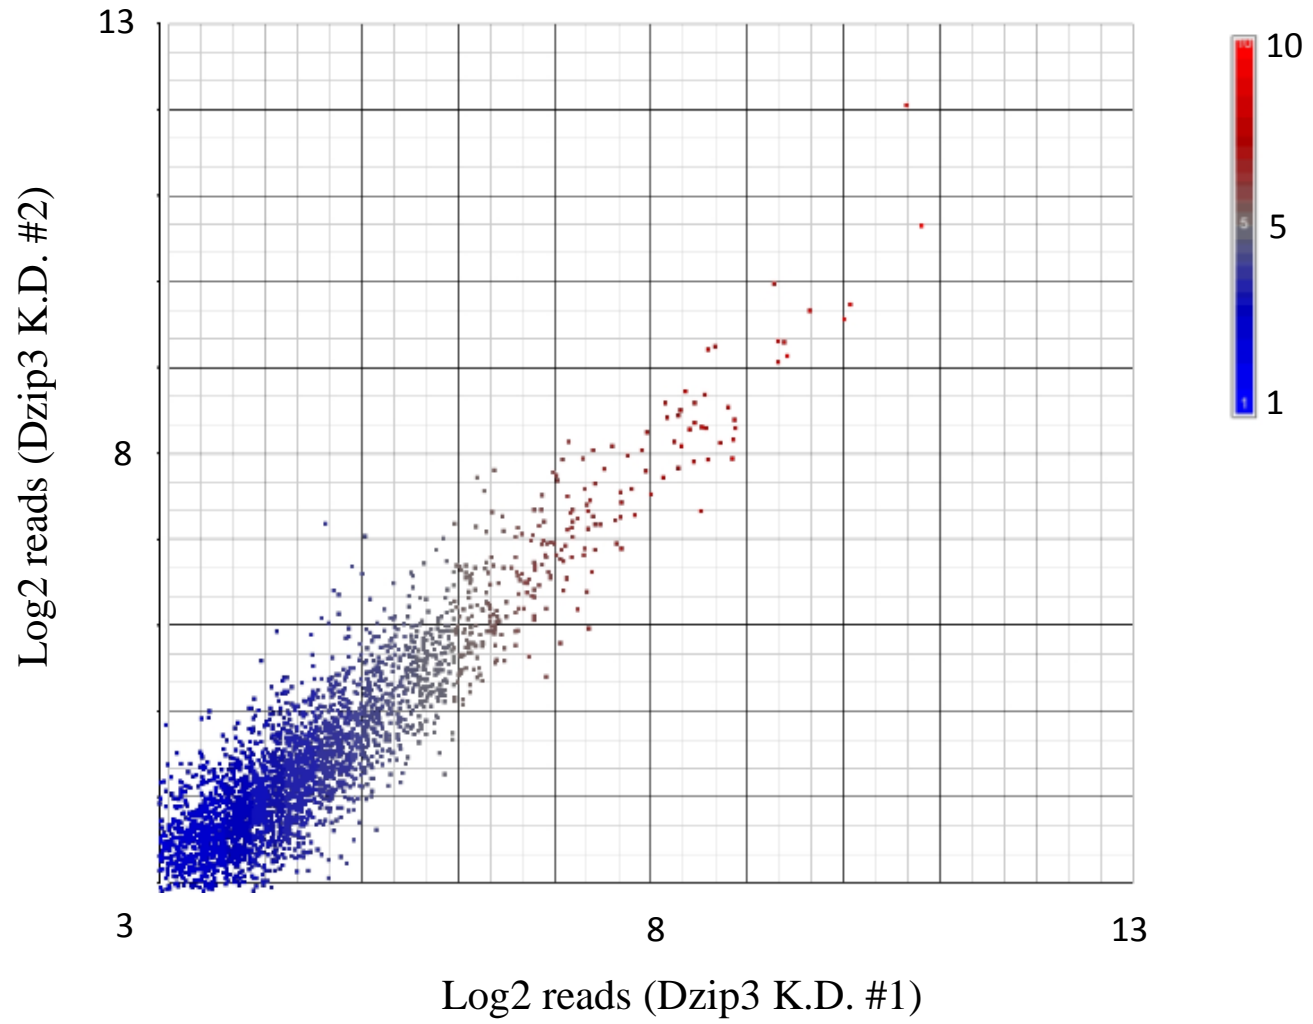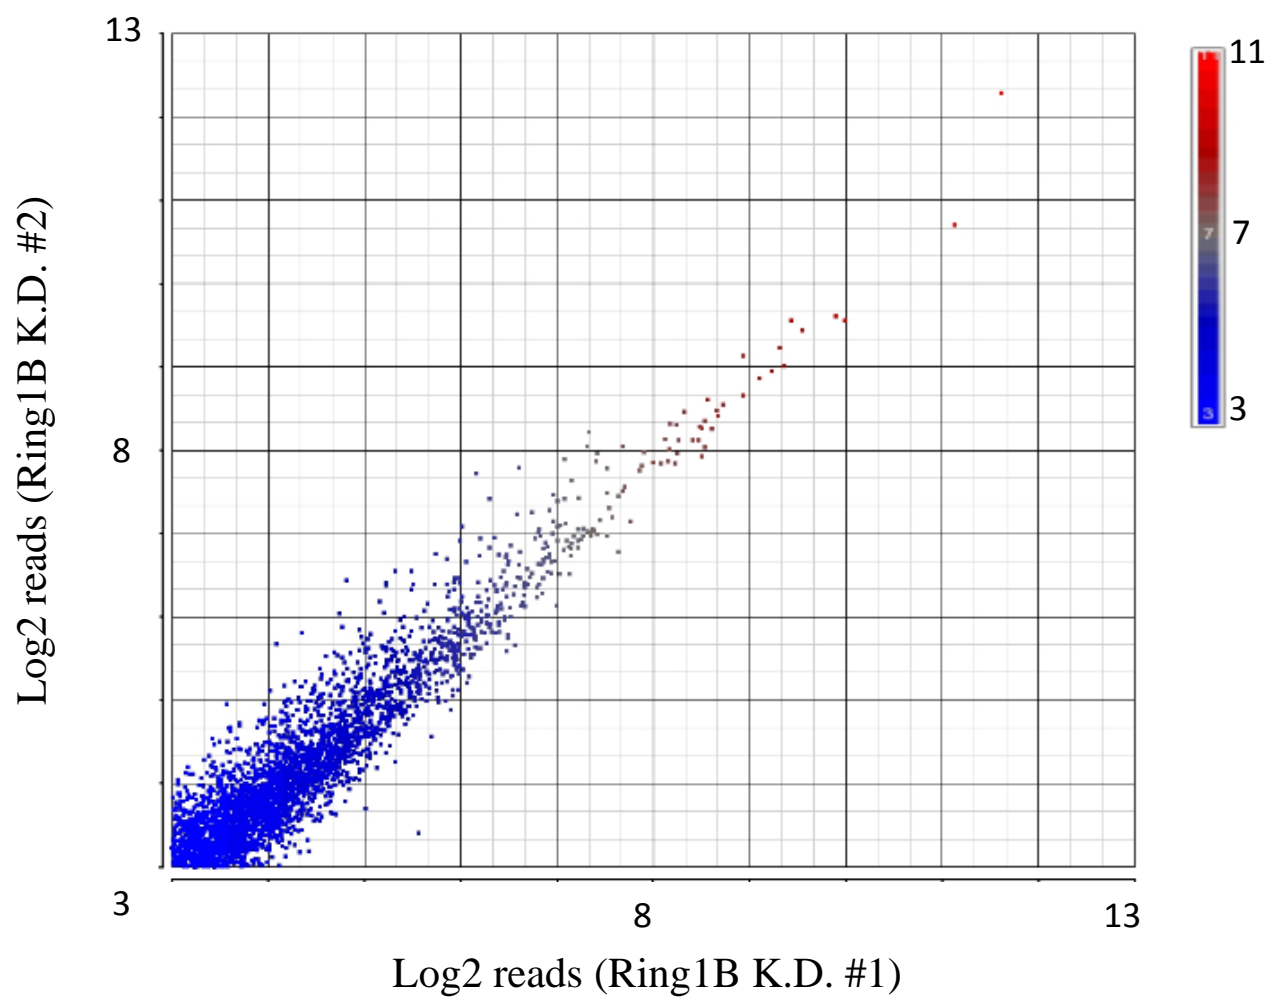

**A**

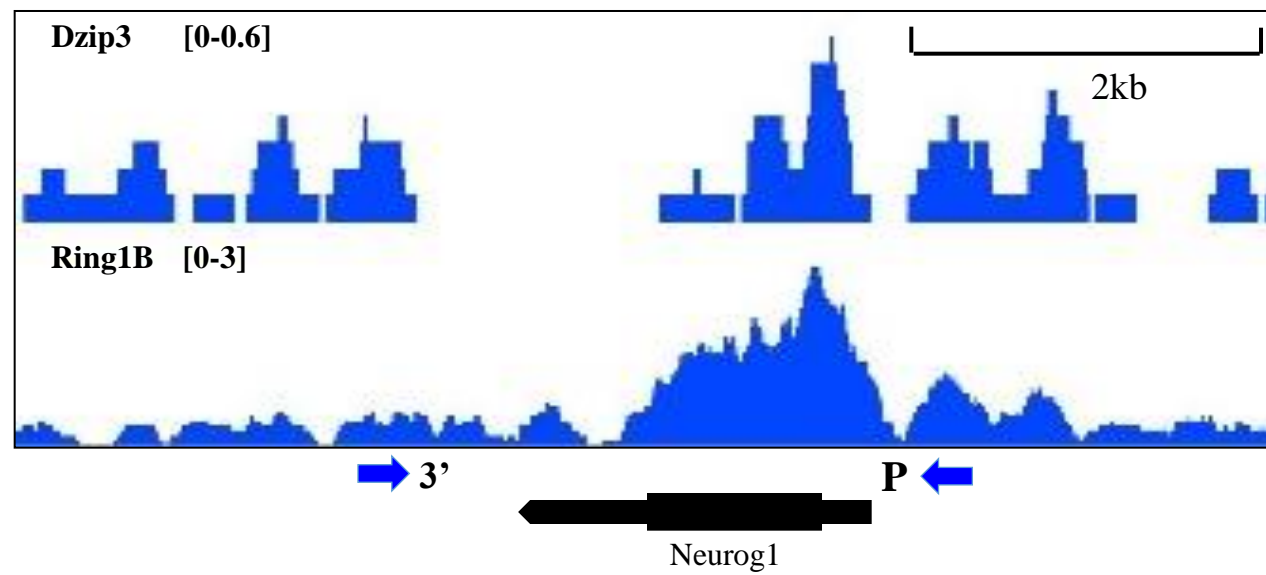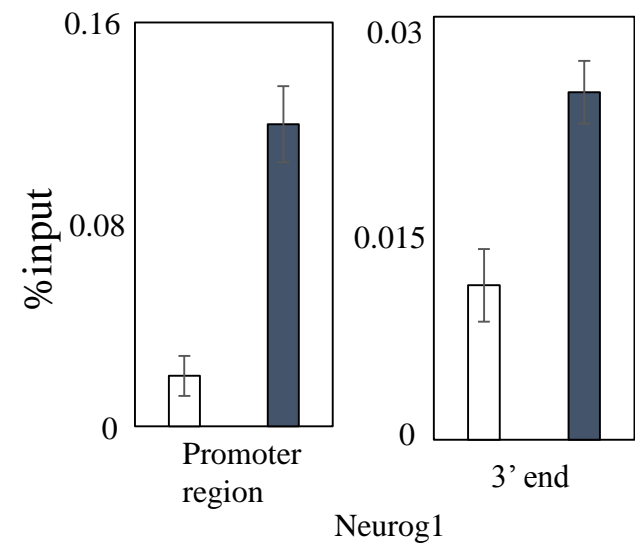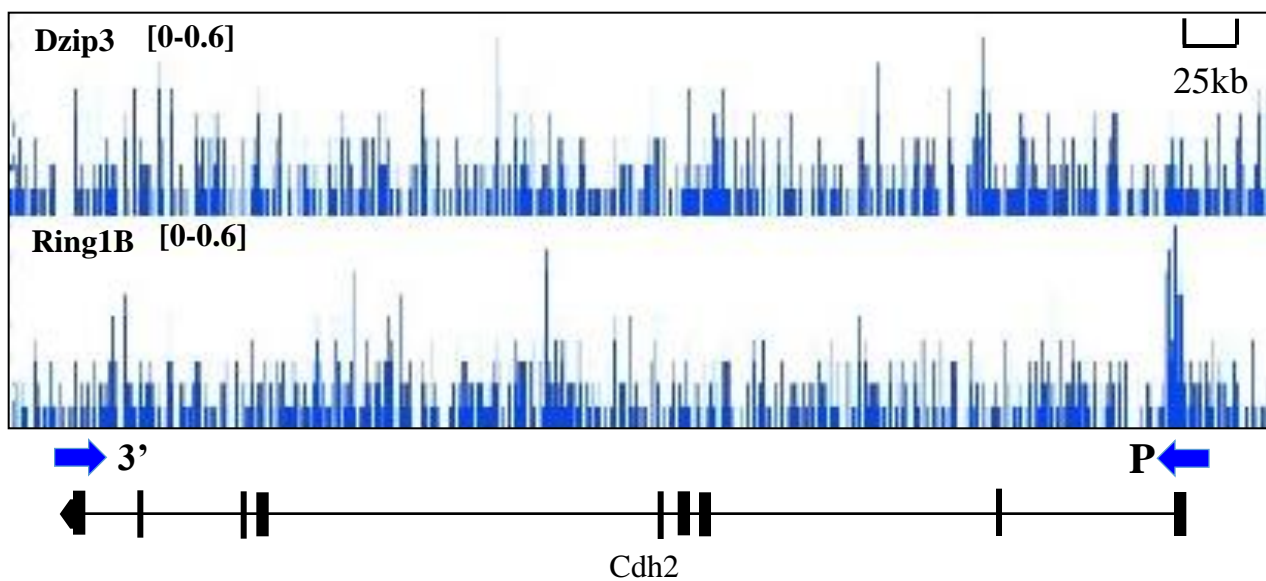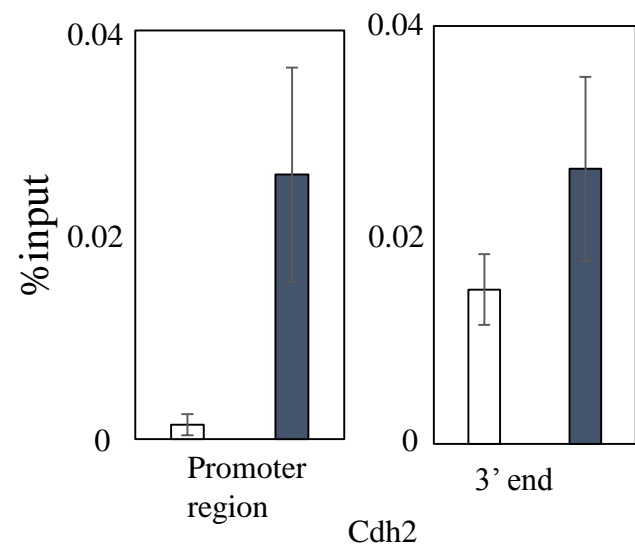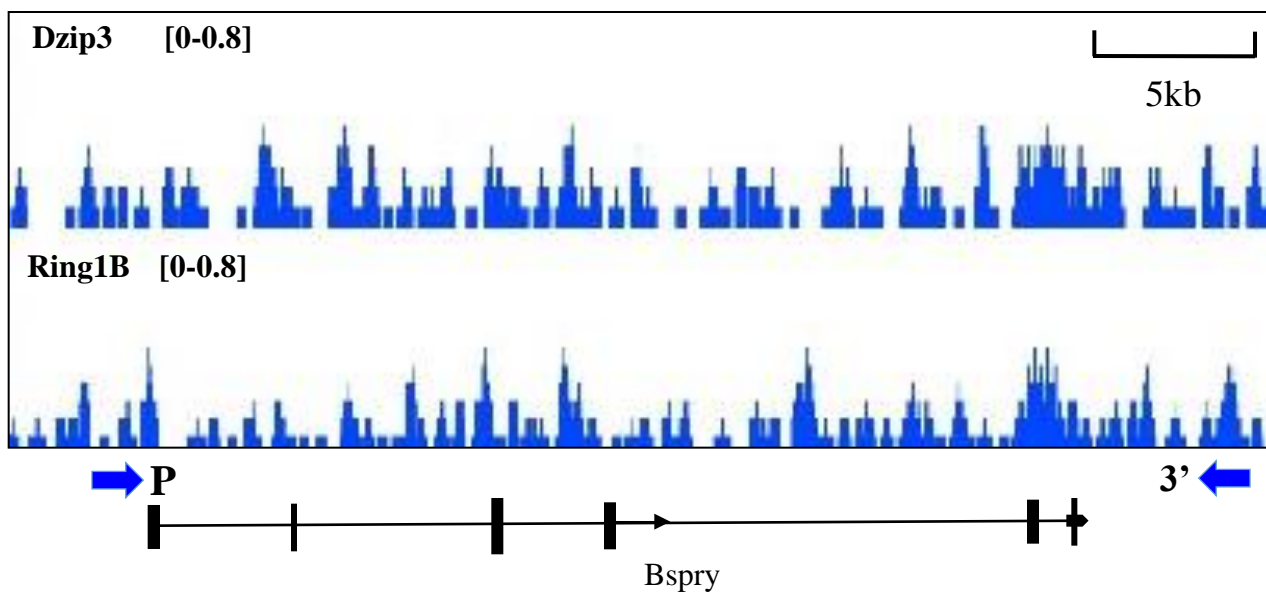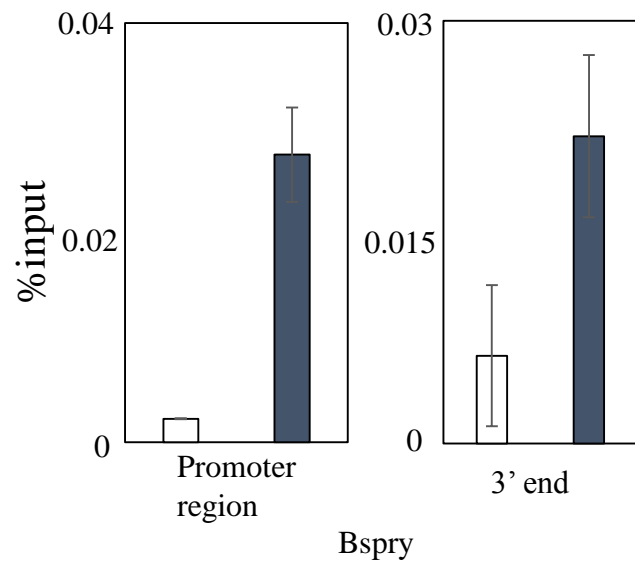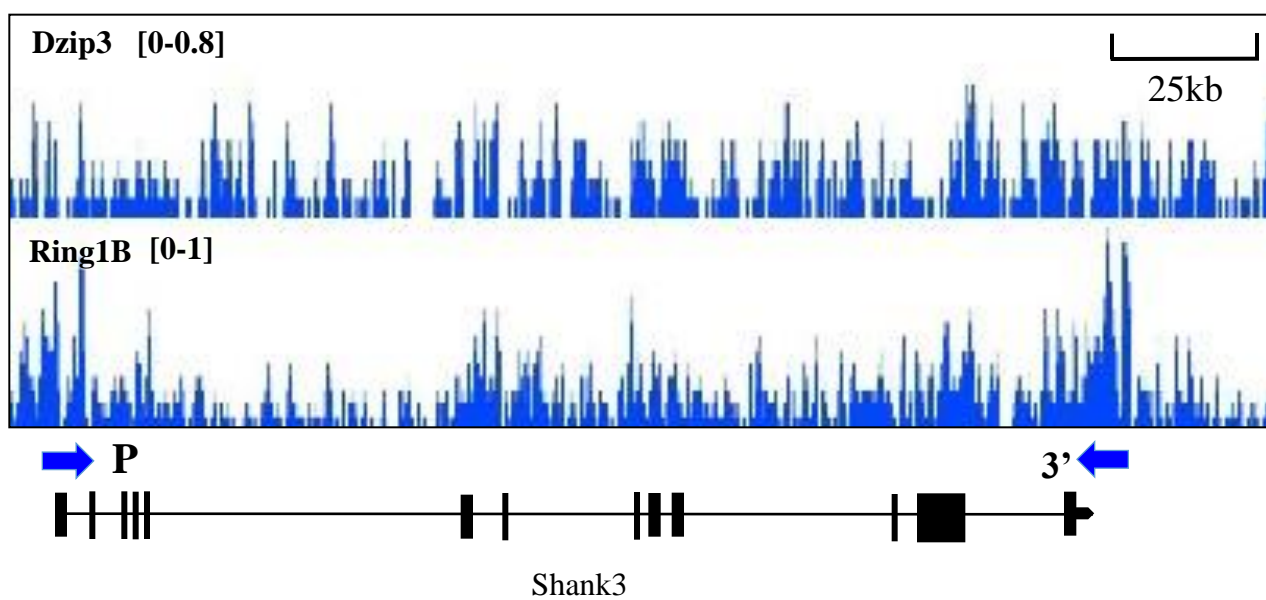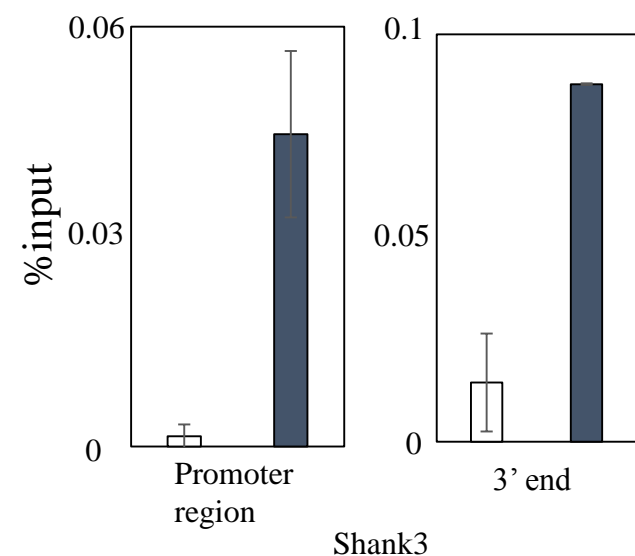

ChIP:  Ct.   $\alpha$ Dzip3

A

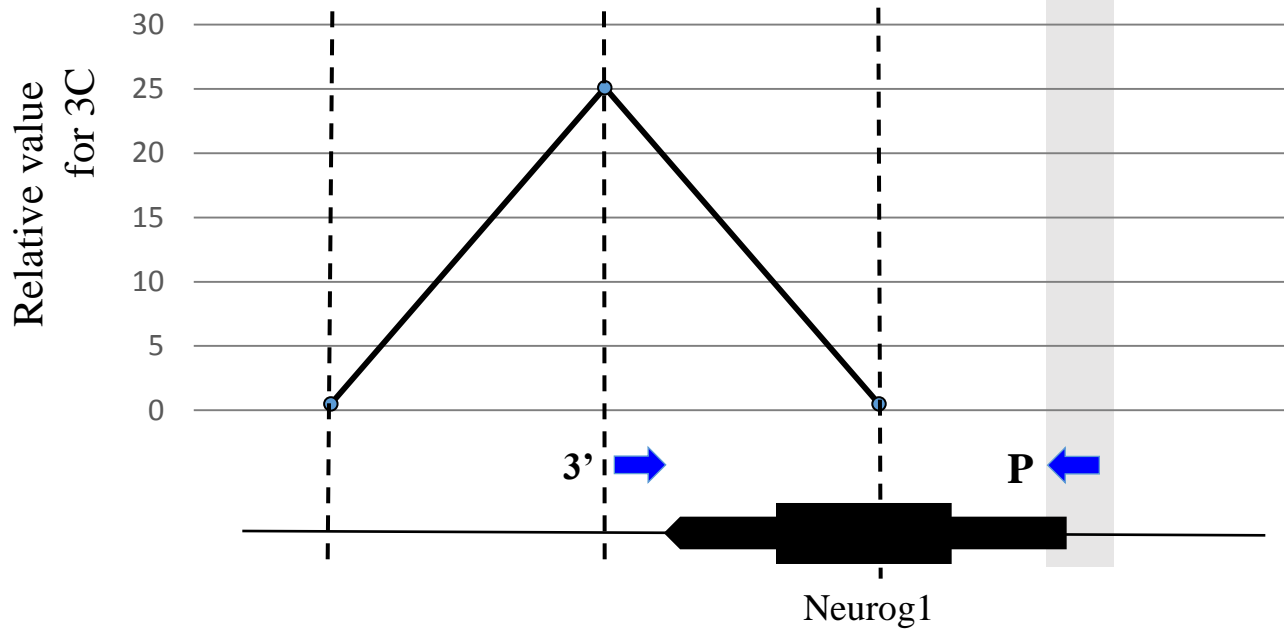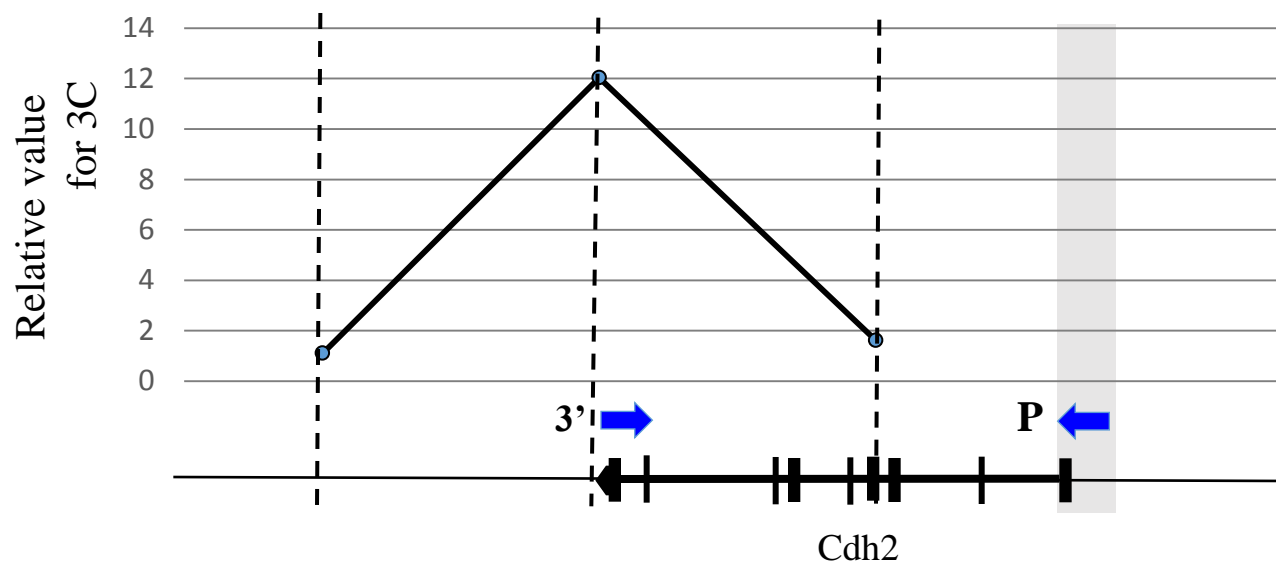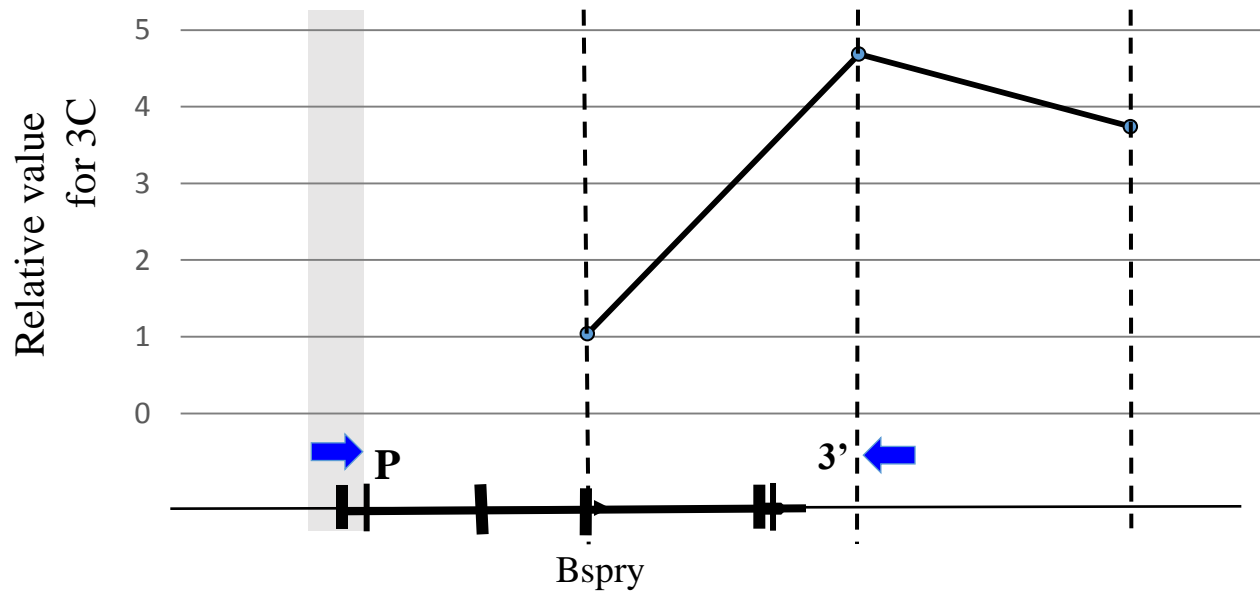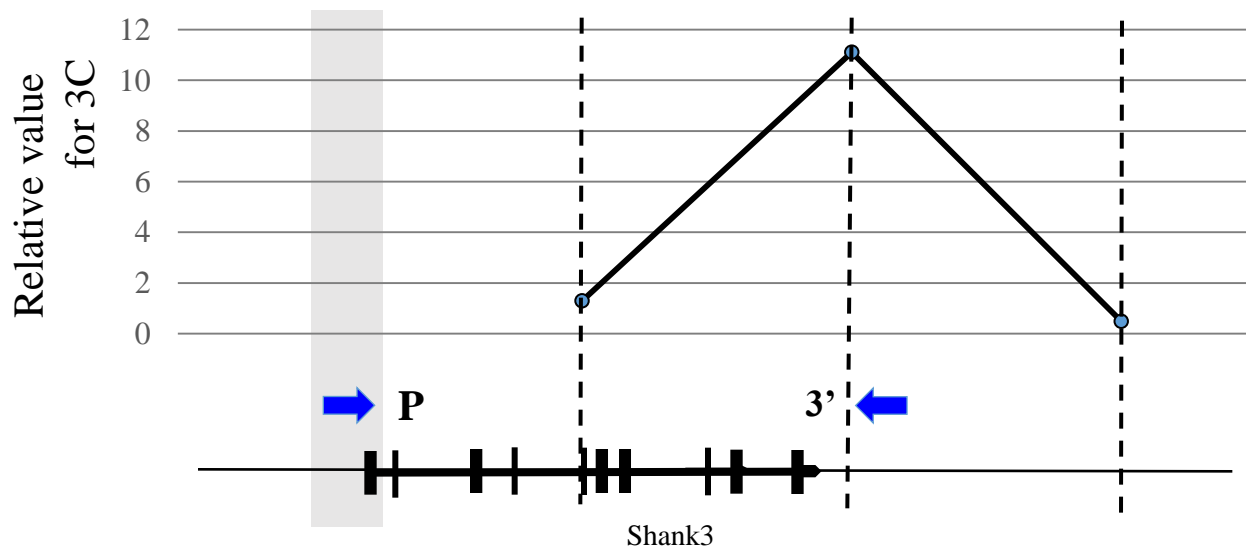

Supplementary Table 1; siRNA sequence

|        |           |                            |
|--------|-----------|----------------------------|
| USP3   | MSS215066 | AUACAACUCUGUCUCAUCAAGUUCC  |
|        | MSS215067 | UAUCUAAGGAGAGAUCUAGGAAUGG  |
| USP16  | MSS232319 | UAUCGCUGAUGUGAAACCACUGCCC  |
|        | MSS232320 | UUCUGUUAGUGCCAGAUCAGGUGGC  |
| USP21  | MSS219991 | AAGCAAUCCCGCAAAGACACUUUGC  |
|        | MSS282610 | AGUACUACGUCUCAAGUGGGUGGC   |
| USP22  | MSS211239 | AUUGUCAUCACCUUUGCAGUGCCGG  |
|        | MSS211240 | AAAUCGUUUGAGAUGGAAACAGGCC  |
| Mysm1  | MSS220542 | UUCAUCGUCAGAUAAUCUCAAUC    |
|        | MSS220543 | AUUACAAGGUAUCAGUUGGAAAGGA  |
| Ring1B | MSS208662 | UUAAUUCACUGUGUAGACUUUCUAGG |
|        | MSS276865 | AACUCAUACAAACUGAGUCCCAUG   |
| Rnf8   | MSS286125 | AACCUUUGAUUAUCAGCUGGUAUGUG |
|        | MSS286127 | AUGACUUCGUAUUAUACUCGCGCG   |
| Dzip3  | MSS212594 | AUUUAUUCCAUCACAGGUGGACUC   |
|        | MSS212595 | UUUCAAGGAAAGUUGGUCUUUAAGG  |

Supplementary Table 2: primer list

| RT-qPCR                     |                         | PCR product (bp) |
|-----------------------------|-------------------------|------------------|
| GAPDH forward               | AGCCTCGTCCCGTAGACAA     | 127              |
| GAPDH reverse               | ATGAAGGGGTGCTTGATGGC    |                  |
| Dzip3 forward               | CCCCAAGTCAGCACAAAGGTT   | 187              |
| Dzip3 reverse               | GCATGTGCCCTGTTGCATCA    |                  |
| Ring1B forward              | AGGAAAGGGTCTTAGCAAGG    | 223              |
| Ring1B reverse              | TTGGTCCGTTTGTACTCGG     |                  |
| Oct 3/4 forward             | CCTTGCACTCAGCCTTAAG     | 185              |
| Oct 3/4 reverse             | CAGAAACATGGTCTCCAGAC    |                  |
| Sox2 forward                | CAGCTACGCGCACATGAACG    | 212              |
| Sox2 reverse                | GCGAGTAGGACATGCTGTAG    |                  |
| Nanog forward               | TCGAATTCTGGGAACGCCTC    | 199              |
| Nanog reverse               | CCTTGTCAGCCTCAGGACTT    |                  |
| Klf4 forward                | ACTTGTGACTATGCAGGCTGT   | 106              |
| Klf4 reverse                | CGTCCCAGTCACAGTGGTAAG   |                  |
| lefty1 forward              | GGACAAGGCTGATGTGGAAGG   | 177              |
| lefty1 reverse              | CCGAACACTAGCAGGTGAGT    |                  |
| T forward                   | CCAGCTCTAAGGAACCACCG    | 137              |
| T reverse                   | ACTCCGAGGCTAGACCAGTT    |                  |
| Stra8 forward               | AGCATCCTTCAACCTGCAAGA   | 149              |
| Stra8 reverse               | CAACAGCCTCAGAGGGGAAC    |                  |
| Eomes forward               | CACAGTTCATCGCTGTGACG    | 178              |
| Eomes reverse               | CCAGGGACAATCTGATGGGA    |                  |
| Acta1 forward               | TACCACCGGCATCGTGTTG     | 190              |
| Acta1 reverse               | GCGCACAAATCTCACGTTGAG   |                  |
| Rhox6 forward               | CTGGCTCAACTGCGGTACAG    | 154              |
| Rhox6 reverse               | ACCAATTCTGCACATCACATTCA |                  |
| Neurod1 forward             | ACAGACGCTCTGCAAAGGTTT   | 163              |
| Neurod1 reverse             | GCACTGGTAGGAGTAGGGATG   |                  |
| Neurog1 forward             | GCGCTTCGCCTACAACACTACAT | 226              |
| Neurog1 reverse             | CGAGGGACTACTGGGGTCAG    |                  |
| Cdh2 forward                | AGGATGTGCACGAAGGACAG    | 101              |
| Cdh2 reverse                | CTTGAAATCTGCTGGCTCGC    |                  |
| ChIP-qPCR (promoter region) |                         |                  |
| Cdh2 forward                | TCGCGGTGCGCGCGC         | 176              |



|                                   |                             |     |
|-----------------------------------|-----------------------------|-----|
| Cdh2 reverse                      | TCCTGGCCACTTGGAGACTG        |     |
| Neurog1 forward                   | CGCGAGCATAAATTATGCAAATAGCAG | 169 |
| Neurog1 reverse                   | TGAGCACCAAGTGTGGCACA        |     |
| Neurod1 forward                   | ACAGGTCCGCGGAGTCTCTA        | 109 |
| Neurod1 reverse                   | GAACCACGTGACCTGCCTAT        |     |
| Shank3 forward                    | GTGCAGTGGAAAGGCAGTAGACA     | 169 |
| Shank3 reverse                    | GCTGCGAGTGAACCAACTCAG       |     |
| Bspry forward                     | CAAGTATGAGAGTGAGATCGCCTCA   | 121 |
| Bspry reverse                     | TGCTAAATGCATTAACAGCGTGTTTG  |     |
| ChIP-qPCR (3' end)                |                             |     |
| Cdh2 forward                      | TGGACATCGCTGAAGACGCA        | 125 |
| Cdh2 reverse                      | GCAGTGCTACCACCAAGCTACA      |     |
| Neurog1 forward                   | CTGCGCCACTGTGGCATCA         | 200 |
| Neurog1 reverse                   | GCTCTTAGACTGGGGGAGGAAG      |     |
| Shank3 forward                    | CTGAGGTCATGTCCTACTGACTTGC   | 168 |
| Shank3 reverse                    | TACCAGGAACTCATAAGTACCACCA   |     |
| Bspry forward                     | TGGACCAGTCTGATTGCAGGA       | 173 |
| Bspry reverse                     | CATCTGACATGACACCCGTA CTG    |     |
| 3C-qPCR                           |                             |     |
| GAPDH (internal region) forward   | CAATGTGTCCGTGCTGGATCTGA     |     |
| GAPDH (internal region) reverse   | GCCTGCTTCACCACCTTCTTG       |     |
| Cdh2 (promoter region) forward    | TGAGACCCACTCAGCTCCTGA       |     |
| Cdh2 (3' end) reverse             | GGCGGGCAGTTTATTTGCAGC       |     |
| Cdh2 (3' end proximal region) re  | GAAGCAGATCCTGTCAAGTGGAAAC   |     |
| Cdh2 (3' end distal region) rever | GTGCCCTGCTCACTGCCT          |     |
| Bspry (promoter region) forward   | CAGCTACTGGCTCTTGAGTGCTTG    |     |
| Bspry (3' end) reverse            | GTGGCTACCTTCCAGAAGGCT       |     |
| Bspry (3' end proximal region) re | ATCGACATCTTTGACACCAACCAT    |     |
| Bspry (3' end distal region) reve | CACTTGAGGCTGACAGGTGATGT     |     |
| Neurog1 (promoter region) forw:   | AGTCAGTGTTTCAGTTTGACGGAATG  |     |
| Neurog1 (3' end) reverse          | GTGCAGCAACCTAACAAGTGGTC     |     |
| Neurog1 (3' end proximal region)  | CTCCAGTCCAGTGCCTGAATAGC     |     |
| Neurog1 (3' end distal region) re | ATGTGAGGCTCTGCTGTAGCAAT     |     |
| Shank3 (promoter region) forwai   | CTGTGTGGTAAGTGGTGTGTTGC     |     |
| Shank3 (3' end) reverse           | CATCCAGGTCAGATGTCCTGGG      |     |
| Shank3 (3' end proximal region)   | CTGGAGCAGGCAGGAACTGTG       |     |
| Shank3 (3' end distal region) rev | CGGCACCACTTGTTCGCT          |     |

Supplementary Table 3; Miseq read number

|          |                         | total read (reads passing filter) | mapped read (1st) | mapped read (2nd) |
|----------|-------------------------|-----------------------------------|-------------------|-------------------|
| RNA-seq  | mES cell Control #1     | 3295525                           | 2864178           | 2849526           |
|          | mES cell Ring1B K.D. #1 | 3757563                           | 3266171           | 3251234           |
|          | mES cell Dzip3 K.D. #1  | 3816009                           | 3206851           | 3198805           |
|          | mES cell Control #2     | 3570604                           | 3156740           | 3142344           |
|          | mES cell Ring1B K.D. #2 | 3549128                           | 3122128           | 3108537           |
|          | mES cell Dzip3 K.D. #2  | 3900100                           | 3431529           | 3425719           |
| ChIP-seq | mES cell input          | 25047339                          | 24167813          | 24132083          |
|          | mES cell Ring1B         | 26601407                          | 25925601          | 25840353          |
|          | mES cell Dzip3          | 27439152                          | 26675271          | 26598187          |
|          | mES cell ubH2A          | 34550852                          | 33577225          | 33459604          |

## **Supporting Information**

### **Supplementary Figure 1. Dzip3 knockdown with two independent siRNAs results in a decrease in the percentage of tightly packed cell colonies.**

(a) The efficiency of knockdown was evaluated in mES cells (serum+LIF) transfected with the indicated specific and control siRNAs through RT-qPCR analysis. Values (normalized to the corresponding values of the internal control gene GAPDH) are the mean $\pm$ SEM of three independent experiments. (b) Two independent Dzip3 siRNAs were used for transfection to exclude the possibility of off-target effects. Statistical significance was assessed by employing the HYPGEOMDIST function ( $P=2.51 \times 10^{-6}$ , negative control [NC] versus Dzip3 siRNA #1;  $P=2.46 \times 10^{-7}$ , NC versus Dzip3 siRNA #2). NTC, no-treatment control. Error bars, standard deviation.

### **Supplementary Figure 2. Full-length images of immunoblots and immunoprecipitation analysis.**

(a)(b) Full-length images of blots corresponding to Figure 1B. (c) Full-length images of blots corresponding to Figure 1C. (d) Nuclear extracts were subjected to immunoprecipitation to confirm specificity of the Dzip3 antibody. (e) The specificity of the Dzip3 antibody was addressed by performing a western blot. (f) Immunoprecipitation was performed to exclude potential cross-reactivity of Dzip3 antibody with Ring1B antibody, as these proteins may serve unique or redundant roles in transcriptional regulation.

### **Supplementary Figure 3. The correlation between duplicate RNA-seq samples.**

(a) Scatterplot of duplicate RNA-seq samples.

**Supplementary Figure 4.** ChIP-seq signal profile of target genes on a whole-gene scale and two-step cross-linking and ChIP-qPCR analysis

(a) Left panel: ChIP-seq signal profile of target genes on a whole-gene scale. Right panel: Two-step cross-linking and ChIP-qPCR analysis of the promoter region and the 3' end of the gene in control mES cells.

**Supplementary Figure 5. 3C-qPCR analysis of long-distance interactions at the target gene locus.**

(a) The relative level of each ligation product plotted according to its distance from the promoter P (see map below graphs). The data are normalized to a GAPDH loading control.

**Supplementary Table 1. siRNA used in this study.**

**Supplementary Table 2. Primers used in this study.**

**Supplementary Table 3. The number of total and mapped reads in RNA-seq and ChIP-seq experiments.**
